# Supplementary material for: A cluster-based selective cooperative spectrum sensing scheme in cognitive radio
Source: Springer Nature journal article supplement (doi:10.1186/1687-1499-2013-176), 2013-06-24
Supplement: 13638_2013_742_MOESM3_ESM.pdf [file 13638_2013_742_MOESM3_ESM.pdf]

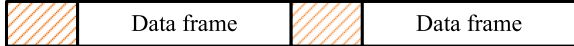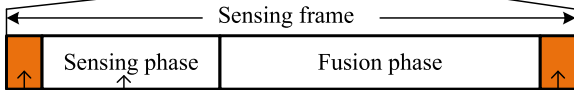

FC: Sensing Request Message

All CUs: Keep quiet and sense spectrum band

FC: Final sensing decision

**Proposed method-based fusion phase**

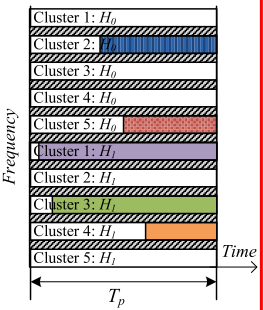

**Conventional direct method-based fusion phase**

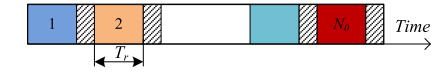

**Conventional cluster method-based fusion phase**

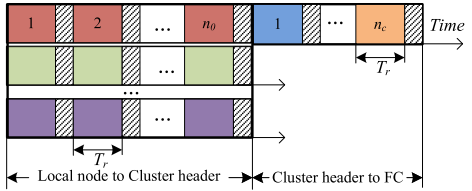

$T_p$ : Parallel reporting time slot;

$T_r$ : Fixed allocation reporting time slot
