# Supplementary material for: A cluster-based selective cooperative spectrum sensing scheme in cognitive radio
Source: Springer Nature journal article supplement (doi:10.1186/1687-1499-2013-176), 2013-06-24

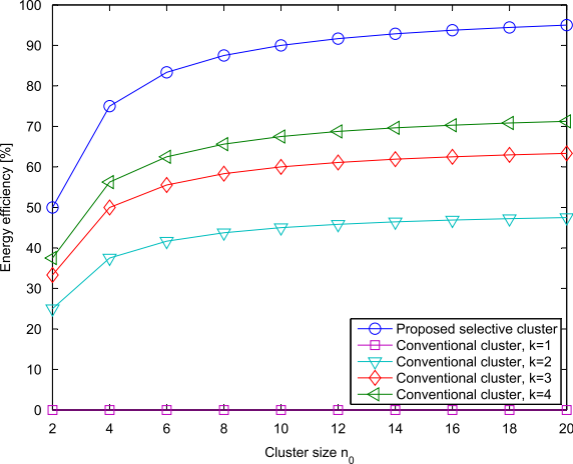

Supplement: 13638_2013_742_MOESM6_ESM.pdf [file 13638_2013_742_MOESM6_ESM.pdf]
